# Supplementary material for: The role of ventromedial prefrontal cortex in reward valuation and future thinking during intertemporal choice
Source: eLife. 2021 Aug 3;10:e67387. doi: 10.7554/eLife.67387 (PMC8331177; doi:10.7554/eLife.67387)
Supplement: Figure 3—figure supplement 1—source data 1. [file elife-67387-fig3-figsupp1-data1.xlsx]

## Sheet: Sheet1
		STANDARD CONDITION														EFT CONDITION															STANDARD CONDITION							EFT CONDITION
		SMALL REWARD							LARGE REWARD							SMALL REWARD							LARGE REWARD								collapsing across REWARDs							collapsing across REWARDs
VMPFC patients		1 week	1 month	3 months	6 months	1 year	3 years	10 years	1 week	1 month	3 months	6 months	1 year	3 years	10 years	1 week	1 month	3 months	6 months	1 year	3 years	10 years	1 week	1 month	3 months	6 months	1 year	3 years	10 years		1 week	1 month	3 months	6 months	1 year	3 years	10 years	1 week	1 month	3 months	6 months	1 year	3 years	10 years
testing site		1	4	14	28	52	156	520	1	4	14	28	52	156	520	1	4	14	28	52	156	520	1	4	14	28	52	156	520		1	4	14	28	52	156	520	1	4	14	28	52	156	520
ITA	P1	0.976625	0.476625	0.86725	0.476625	0.11725	0.49225	0.0235	0.992187	0.992187	0.492187	0.492187	0.242187	0.117187	0.117187	0.4375	0.5	0.4375	0.25	0.25	0.475	0.0125	0.992667	0.492667	0.226667	0.492667	0.242667	0.508	0.008		0.984406	0.734406	0.679718	0.484406	0.179718	0.304718	0.0703433	0.715083	0.496333	0.332083	0.371333	0.246333	0.4915	0.01025
ITA	P2	0.711	0.61725	0.24225	0.61725	0.476625	0.42975	0.1485	0.929687	0.83594	0.71094	0.72656	0.492187	0.46094	0.242187	0.85	0.975	0.875	0.85	0.875	0.875	0.9375	0.726667	0.726667	0.742667	0.664	0.68	0.93	0.93		0.820343	0.726595	0.476595	0.671905	0.484406	0.445345	0.195343	0.788333	0.850833	0.808833	0.757	0.7775	0.9025	0.93375
ITA	P3	0.80475	0.61725	0.211	0.601625	0.24225	0.17975	0.211	0.820313	0.867187	0.83594	0.72656	0.742187	0.429687	0.242187	0.875	0.9375	0.7	0.7625	0.25	0.25	0.25	0.93	0.962	0.836667	0.617333	0.788667	0.492667	0.117333		0.812532	0.742218	0.52347	0.664092	0.492218	0.304718	0.226593	0.9025	0.94975	0.768333	0.689917	0.519333	0.371333	0.183667
ITA	P4	0.695375	0.289125	0.476625	0.101625	0.11725	0.211	0.0235	0.820313	0.52344	0.72656	0.632813	0.64844	0.22656	0.0546867	0.7625	0.575	0.375	0.5	0.25	0.375	0.4125	0.617333	0.462	0.320667	0.196	0.383333	0.320667	0.149333		0.757844	0.406282	0.601592	0.367219	0.382845	0.21878	0.0390933	0.689917	0.5185	0.347833	0.348	0.316667	0.347833	0.280917
CAN	P5	0.242188	0.617188	0.242188	0.242188	0.226562	0.0546875	0.0234375	0.492188	0.492188	0.242188	0.148438	0.0546875	0.0546875	0.0078125	0.445312	0.992188	0.195312	0.804688	0.242188	0.804688	0.0078125	0.804688	0.257812	0.726562	0.351562	0.617188	0.257812	0.445312		0.367188	0.554688	0.242188	0.195312	0.140625	0.0546875	0.015625	0.625	0.625	0.460938	0.578125	0.429688	0.53125	0.226562
CAN	P6	0.992188	0.992188	0.242188	0.117188	0.382812	0.242188	0.0078125	0.992188	0.523438	0.382812	0.0546875	0.882812	0.117188	0.0234375	0.992188	0.242188	0.242188	0.242188	0.242188	0.0078125	0.0078125	0.945312	0.242188	0.242188	0.117188	0.492188	0.992188	0.117188		0.992188	0.757812	0.3125	0.0859375	0.632812	0.179688	0.015625	0.96875	0.242188	0.242188	0.179688	0.367188	0.5	0.0625
CAN	P7	0.507812	0.398438	0.320312	0.117188	0.117188	0.117188	0.0078125	0.664062	0.179688	0.882812	0.507812	0.0390625	0.0078125	0.0078125	0.273438	0.0546875	0.554688	0.445312	0.476562	0.757812	0.101562	0.992188	0.617188	0.0234375	0.757812	0.0703125	0.992188	0.0078125		0.585938	0.289062	0.601562	0.3125	0.078125	0.0625	0.0078125	0.632812	0.335938	0.289062	0.601562	0.273438	0.875	0.0546875
CAN	P8	0.992188	0.789062	0.507812	0.945312	0.742188	0.117188	0.148438	0.992188	0.757812	0.882812	0.867188	0.492188	0.242188	0.0078125	0.898438	0.945312	0.898438	0.695312	0.898438	0.617188	0.492188	0.492188	0.960938	0.898438	0.804688	0.867188	0.679688	0.445312		0.992188	0.773438	0.695312	0.90625	0.617188	0.179688	0.078125	0.695312	0.953125	0.898438	0.75	0.882812	0.648438	0.46875
CAN	P9	0.945312	0.507812	0.242188	0.492188	0.492188	0.304688	0.132812	0.867188	0.742188	0.757812	0.945312	0.492188	0.304688	0.0703125	0.882812	0.882812	0.976562	0.882812	0.882812	0.617188	0.320312	0.945312	0.992188	0.898438	0.976562	0.492188	0.335938	0.429688		0.90625	0.625	0.5	0.71875	0.492188	0.304688	0.101562	0.914062	0.9375	0.9375	0.929688	0.6875	0.476562	0.375
CAN	P10	0.945312	0.742188	0.914062	0.695312	0.492188	0.492188	0.492188	0.867188	0.742188	0.679688	0.976562	0.945312	0.367188	0.101562	0.960938	0.882812	0.476562	0.523438	0.242188	0.492188	0.429688	0.976562	0.992188	0.898438	0.742188	0.492188	0.554688	0.242188		0.90625	0.742188	0.796875	0.835938	0.71875	0.429688	0.296875	0.96875	0.9375	0.6875	0.632812	0.367188	0.523438	0.335938
CAN	P11	0.992188	0.882812	0.492188	0.492188	0.710938	0.242188	0.195312	0.945312	0.742188	0.742188	0.742188	0.492188	0.492188	0.242188	0.945312	0.882812	0.492188	0.976562	0.117188	0.0546875	0.0078125	0.992188	0.867188	0.945312	0.945312	0.0390625	0.0546875	0.0078125		0.96875	0.8125	0.617188	0.617188	0.601562	0.367188	0.21875	0.96875	0.875	0.71875	0.960938	0.078125	0.0546875	0.0078125
CAN	P12	0.945312	0.882812	0.851562	0.945312	0.882812	0.492188	0.492188	0.929688	0.929688	0.882812	0.617188	0.492188	0.242188	0.492188	0.742188	0.742188	0.789062	0.695312	0.742188	0.601562	0.757812	0.851562	0.804688	0.742188	0.742188	0.617188	0.429688	0.695312		0.9375	0.90625	0.867188	0.78125	0.6875	0.367188	0.492188	0.796875	0.773438	0.765625	0.71875	0.679688	0.515625	0.726562
*in red vmPFC, extending into LPFC
AVERAGE VMPFC		0.812521	0.651062	0.467469	0.487	0.416687	0.281271	0.158875	0.859375	0.694011	0.684896	0.619791	0.501302	0.255208	0.134114	0.755469	0.717708	0.584375	0.635677	0.455729	0.49401	0.311458	0.855556	0.698142	0.625139	0.617292	0.481847	0.545684	0.299608		0.835948	0.672537	0.576182	0.553396	0.458995	0.26824	0.146495	0.805512	0.707925	0.604757	0.626484	0.468788	0.519847	0.305533
HEALTHY CONTROLS
ITA	1	0.99225	0.17975	0.757875	0.80475	0.05475	0.24225	0.070375	0.46094	0.492187	0.97656	0.367187	0.929687	0.492187	0.02344	1	0.8875	0.75	0.7625	0.7625	0.7625	0.125	0.992667	0.992667	0.992667	0.992667	0.946	0.117333	0.008		0.726595	0.335968	0.867217	0.585968	0.492218	0.367218	0.0469075	0.996333	0.940083	0.871333	0.877583	0.85425	0.439917	0.0665
ITA	2	0.24225	0.2735	0.11725	0.11725	0.11725	0.17975	0.0235	0.757813	0.60156	0.242187	0.117187	0.21094	0.03906	0.195313	0.8125	0.8125	0.875	0.5	0.5	1	0.7875	0.742667	0.462	0.446	0.462	0.226667	0.476667	0.446		0.500032	0.43753	0.179718	0.117218	0.164095	0.109405	0.109407	0.777583	0.63725	0.6605	0.481	0.363333	0.738333	0.61675
ITA	3	0.80475	0.49225	0.36725	0.49225	0.17975	0.61725	0.05475	0.97656	0.742187	0.882813	0.570313	0.804887	0.46094	0.0546867	0.95	0.8875	0.5	0.7625	0.7625	0.5	0.25	0.962	0.742667	0.742667	0.617333	0.774	0.492667	0.367333		0.890655	0.617218	0.625032	0.531282	0.492318	0.539095	0.0547183	0.956	0.815083	0.621333	0.689917	0.76825	0.496333	0.308667
ITA	4	0.882875	0.86725	0.49225	0.30475	0.226625	0.101625	0.007875	0.97656	0.242187	0.78906	0.695313	0.66406	0.35156	0.0703133	1	1	0.75	0.875	0.5	0.5	0.375	0.992667	0.93	0.93	0.804667	0.726667	0.617333	0.538667		0.929717	0.554718	0.640655	0.500032	0.445342	0.226593	0.0390942	0.996333	0.965	0.84	0.839833	0.613333	0.558667	0.456833
ITA	5	0.476625	0.61725	0.476625	0.61725	0.211	0.851625	0.086	0.742187	0.97656	0.945313	0.492187	0.89844	0.89844	0.242187	0.8875	0.9125	0.9375	0.7875	0.8875	0.875	0.85	0.962	0.93	0.93	0.946	0.93	0.742667	0.93		0.609406	0.796905	0.710969	0.554718	0.55472	0.875032	0.164093	0.92475	0.92125	0.93375	0.86675	0.90875	0.808833	0.89
ITA	6	0.99225	0.976625	0.36725	0.11725	0.211	0.226625	0.007875	0.992187	0.992187	0.992187	0.882813	0.89844	0.117187	0.00741333	1	1	1	0.875	0.875	0.075	0.0125	0.992667	0.992667	0.992667	0.992667	0.899333	0.758	0.008		0.992218	0.984406	0.679718	0.500032	0.55472	0.171906	0.00764417	0.996333	0.996333	0.996333	0.933833	0.887167	0.4165	0.01025
ITA	7	0.17975	0.961	0.945375	0.961	0.8985	0.24225	0.226625	0.72656	0.97656	0.96094	0.867187	0.929687	0.804687	0.757813	0.975	0.975	0.975	0.975	0.9375	0.875	0.7625	0.976667	0.992667	0.992667	0.946	0.976667	0.899333	0.742667		0.453155	0.96878	0.953157	0.914093	0.914093	0.523468	0.492219	0.975833	0.983833	0.983833	0.9605	0.957083	0.887167	0.752583
ITA	8	0.61725	0.1485	0.211	0.11725	0.05475	0.0235	0.007875	0.492187	0.304687	0.242187	0.0546867	0.08594	0.00781333	0.00781333	0.875	0.75	0.5	0.5	0.25	0.25	0.125	0.774	0.492667	0.462	0.43	0.446	0.446	0.196		0.554718	0.226593	0.226593	0.0859683	0.070345	0.0156567	0.00784417	0.8245	0.621333	0.481	0.465	0.348	0.348	0.1605
ITA	9	0.257875	0.1485	0.11725	0.11725	0.0235	0.05475	0.0235	0.367187	0.53906	0.367187	0.21094	0.08594	0.00781333	0.02344	0.875	0.75	1	0.25	0.25	0.25	0.0375	0.992667	0.883333	0.68	0.726667	0.462	0.399333	0.867333		0.312531	0.34378	0.242218	0.164095	0.05472	0.0312817	0.02347	0.933833	0.816667	0.84	0.488333	0.356	0.324667	0.452417
ITA	10	0.61725	0.101625	0.99225	0.67975	0.211	0.99225	0.007875	0.242187	0.367187	0.742187	0.89844	0.89844	0.882813	0.00781333	0.9375	0.975	0.95	0.9375	0.875	0.75	0.0125	0.962	0.93	0.93	0.804667	0.804667	0.804667	0.804667		0.429718	0.234406	0.867218	0.789095	0.55472	0.937532	0.00784417	0.94975	0.9525	0.94	0.871083	0.839833	0.777333	0.408583
ITA	11	0.99225	0.961	0.820375	0.195375	0.945375	0.11725	0.8985	0.492187	0.35156	0.97656	0.679687	0.867187	0.742187	0.492187	1	0.95	1	0.8875	0.8875	0.8875	0.8875	0.992667	0.992667	0.976667	0.992667	0.962	0.962	0.742667		0.742218	0.65628	0.898467	0.437531	0.906281	0.429718	0.695343	0.996333	0.971333	0.988333	0.940083	0.92475	0.92475	0.815083
ITA	12	0.92975	0.664125	0.961	0.80475	0.695375	0.132875	0.086	0.89844	0.992187	0.72656	0.742187	0.91406	0.91406	0.492187	1	0.95	0.875	0.8875	0.8875	0.825	0.5125	0.992667	0.992667	0.976667	0.962	0.962	0.867333	0.758		0.914095	0.828156	0.84378	0.773468	0.804717	0.523467	0.289093	0.996333	0.971333	0.925833	0.92475	0.92475	0.846167	0.63525
ITA	13	0.86725	0.3985	0.92975	0.86725	0.92975	0.789125	0.36725	0.742187	0.929687	0.742187	0.679687	0.867187	0.72656	0.445313	0.975	0.9125	0.75	0.875	0.9125	0.75	0.6375	0.992667	0.962	0.946	0.851333	0.962	0.867333	0.93		0.804718	0.664093	0.835968	0.773468	0.898468	0.757842	0.406282	0.983833	0.93725	0.848	0.863167	0.93725	0.808667	0.78375
ITA	14	0.507875	0.101625	0.101625	0.586	0.132875	0.17975	0.101625	0.83594	0.64844	0.429687	0.507813	0.882813	0.46094	0.117187	0.225	0.225	0.6625	0.225	0.25	0.225	0.2	0.883333	0.883333	0.883333	0.883333	0.883333	0.883333	0.883333		0.671908	0.375032	0.265656	0.546907	0.507844	0.320345	0.109406	0.554167	0.554167	0.772917	0.554167	0.566667	0.554167	0.541667
ITA	15	0.601625	0.36725	0.507875	0.242	0.05475	0.226625	0.007875	0.89844	0.554687	0.445313	0.47656	0.47656	0.242187	0.00781333	1	0.5	1	0.7625	1	0.5125	0.125	0.976667	0.883333	0.992667	0.883333	0.992667	0.446	0.0546667		0.750033	0.460968	0.476594	0.35928	0.265655	0.234406	0.00784417	0.988333	0.691667	0.996333	0.822917	0.996333	0.47925	0.0898333
ITA	16	0.882875	0.24225	0.5235	0.61725	0.211	0.74225	0.695375	0.83594	0.867187	0.492187	0.867187	0.10156	0.742187	0.804687	1	1	0.7	0.975	0.9375	0.625	0.75	0.992667	0.992667	0.976667	0.93	0.976667	0.976667	0.867333		0.859407	0.554718	0.507843	0.742218	0.15628	0.742218	0.750031	0.996333	0.996333	0.838333	0.9525	0.957083	0.800833	0.808667
ITA	17	0.49225	0.55475	0.726625	0.507875	0.3985	0.24225	0.05475	0.882813	0.242187	0.28906	0.66406	0.28906	0.28906	0.0546867	0.85	0.85	0.475	0.5	0.475	0.25	0.4375	0.93	0.867333	0.867333	0.726667	0.899333	0.867333	0.726667		0.687532	0.398468	0.507842	0.585967	0.34378	0.265655	0.0547183	0.89	0.858667	0.671167	0.613333	0.687167	0.558667	0.582083
ITA	18	0.74225	0.507875	0.586	0.05475	0.42975	0.0235	0.0235	0.757813	0.507813	0.242187	0.695313	0.367187	0.132813	0.0546867	0.7625	0.7625	0.75	0.625	0.575	0.5	0.25	0.804667	0.570667	0.383333	0.633333	0.758	0.304667	0.258		0.750032	0.507844	0.414093	0.375032	0.398468	0.0781567	0.0390933	0.783583	0.666583	0.566667	0.629167	0.6665	0.402333	0.254
ITA	19	0.74225	0.757875	0.101625	0.17975	0.24225	0.0235	0.007875	0.492187	0.945313	0.242187	0.882813	0.492187	0.382813	0.00781333	1	0.875	0.875	0.75	0.5	0.5	0.125	0.992667	0.992667	0.93	0.93	0.851333	0.492667	0.117333		0.617218	0.851594	0.171906	0.531282	0.367218	0.203157	0.00784417	0.996333	0.933833	0.9025	0.84	0.675667	0.496333	0.121167
ITA	20	0.99225	0.92975	0.3985	0.49225	0.476625	0.24225	0.039125	0.742187	0.85156	0.85156	0.804687	0.78906	0.242187	0.03906	1	0.875	0.95	0.825	0.7625	0.875	0.125	0.992667	0.992667	0.93	0.93	0.883333	0.867333	0.758		0.867218	0.890655	0.62503	0.648468	0.632842	0.242218	0.0390925	0.996333	0.933833	0.94	0.8775	0.822917	0.871167	0.4415
ITA	21	0.36725	0.74225	0.070375	0.789125	0.195375	0.8985	0.601625	0.492187	0.320313	0.992187	0.804687	0.320313	0.679687	0.66406	1	1	1	1	1	0.9375	0.975	0.93	0.992667	0.962	0.962	0.93	0.93	0.696		0.429718	0.531282	0.531281	0.796906	0.257844	0.789093	0.632842	0.965	0.996333	0.981	0.981	0.965	0.93375	0.8355
ITA	22	0.99225	0.92975	0.42975	0.101625	0.05475	0.0235	0.007875	0.945313	0.742187	0.445313	0.257813	0.117187	0.00781333	0.00781333	0.4375	0.5	0.5125	0.475	0.45	0.45	0.875	0.804667	0.43	0.43	0.43	0.43	0.43	0.336667		0.968782	0.835968	0.437532	0.179719	0.0859683	0.0156567	0.00784417	0.621083	0.465	0.47125	0.4525	0.44	0.44	0.605833
ITA	23	0.882875	0.836	0.7735	0.24225	0.211	0.11725	0.0235	0.804687	0.929687	0.83594	0.929687	0.867187	0.46094	0.242187	1	0.875	0.5	0.75	0.5	0.25	0.125	0.992667	0.93	0.93	0.883333	0.93	0.867333	0.492667		0.843781	0.882843	0.80472	0.585968	0.539093	0.289095	0.132843	0.996333	0.9025	0.715	0.816667	0.715	0.558667	0.308833
ITA	24	0.80475	0.445375	0.5235	0.086	0.007875	0.164125	0.007875	0.77344	0.83594	0.382813	0.304687	0.132813	0.195313	0.00781333	0.875	0.475	1	1	0.0125	0.25	0.0125	0.992667	0.962	0.992667	0.664	0.93	0.664	0.992667		0.789095	0.640657	0.453157	0.195343	0.0703442	0.179719	0.00784417	0.933833	0.7185	0.996333	0.832	0.47125	0.457	0.502583
ITA	25	0.99225	0.8985	0.226625	0.36725	0.226625	0.30475	0.0235	0.992187	0.83594	0.867187	0.242187	0.804687	0.46094	0.03906	1	0.9375	0.975	0.875	0.625	0.75	0.35	0.992667	0.992667	0.93	0.976667	0.883333	0.93	0.383333		0.992218	0.86722	0.546906	0.304718	0.515656	0.382845	0.03128	0.996333	0.965083	0.9525	0.925833	0.754167	0.84	0.366667
ITA	26	0.99225	0.914125	0.507875	0.3985	0.789125	0.0235	0.05475	0.96094	0.492187	0.52344	0.820313	0.867187	0.757813	0.16406	1	1	0.625	0.625	0.625	0.5	0.25	0.992667	0.992667	0.93	0.664	0.992667	0.664	0.0386667		0.976595	0.703156	0.515658	0.609407	0.828156	0.390657	0.109405	0.996333	0.996333	0.7775	0.6445	0.808833	0.582	0.144333
ITA	27	0.67975	0.507875	0.757875	0.24225	0.24225	0.24225	0.05475	0.804687	0.78906	0.742187	0.78906	0.72656	0.257813	0.117187	1	1	0.875	1	0.9375	0.5	0.5	0.992667	0.992667	0.93	0.867333	0.976667	0.93	0.742667		0.742218	0.648467	0.750031	0.515655	0.484405	0.250032	0.0859683	0.996333	0.996333	0.9025	0.933667	0.957083	0.715	0.621333
CAN	28	0.757812	0.242188	0.757812	0.492188	0.429688	0.0078125	0.0078125	0.992188	0.851562	0.710938	0.882812	0.0078125	0.0078125	0.0078125	0.929688	0.835938	0.929688	0.929688	0.929688	0.429688	0.242188	0.976562	0.867188	0.976562	0.960938	0.960938	0.960938	0.960938		0.875	0.546875	0.734375	0.6875	0.21875	0.0078125	0.0078125	0.953125	0.851562	0.953125	0.945312	0.945312	0.695312	0.601562
CAN	29	0.898438	0.898438	0.992188	0.742188	0.742188	0.117188	0.289062	0.992188	0.945312	0.945312	0.945312	0.945312	0.492188	0.945312	0.914062	0.882812	0.882812	0.835938	0.742188	0.992188	0.492188	0.992188	0.992188	0.992188	0.992188	0.960938	0.992188	0.414062		0.945312	0.921875	0.96875	0.84375	0.84375	0.304688	0.617188	0.953125	0.9375	0.9375	0.914062	0.851562	0.992188	0.453125
CAN	30	0.992188	0.992188	0.304688	0.117188	0.210938	0.0078125	0.0078125	0.867188	0.976562	0.742188	0.242188	0.117188	0.0546875	0.0078125	0.882812	0.929688	0.820312	0.242188	0.492188	0.492188	0.242188	0.945312	0.929688	0.992188	0.242188	0.492188	0.492188	0.0234375		0.929688	0.984375	0.523438	0.179688	0.164062	0.03125	0.0078125	0.914062	0.929688	0.90625	0.242188	0.492188	0.492188	0.132812
CAN	31	0.992188	0.492188	0.242188	0.492188	0.492188	0.492188	0.0546875	0.992188	0.992188	0.851562	0.992188	0.632812	0.492188	0.0546875	0.992188	0.945312	0.445312	0.429688	0.445312	0.195312	0.0546875	0.960938	0.867188	0.851562	0.742188	0.492188	0.445312	0.0546875		0.992188	0.742188	0.546875	0.742188	0.5625	0.492188	0.0546875	0.976562	0.90625	0.648438	0.585938	0.46875	0.320312	0.0546875
CAN	32	0.992188	0.992188	0.945312	0.492188	0.242188	0.242188	0.242188	0.992188	0.992188	0.492188	0.242188	0.492188	0.117188	0.0546875	0.992188	0.992188	0.992188	0.992188	0.992188	0.742188	0.242188	0.992188	0.992188	0.992188	0.992188	0.992188	0.929688	0.867188		0.992188	0.992188	0.71875	0.367188	0.367188	0.179688	0.148438	0.992188	0.992188	0.992188	0.992188	0.992188	0.835938	0.554688
CAN	33	0.992188	0.992188	0.976562	0.945312	0.882812	0.757812	0.367188	0.992188	0.992188	0.992188	0.976562	0.898438	0.835938	0.492188	0.992188	0.992188	0.742188	0.867188	0.992188	0.492188	0.492188	0.992188	0.992188	0.992188	0.992188	0.976562	0.992188	0.992188		0.992188	0.992188	0.984375	0.960938	0.890625	0.796875	0.429688	0.992188	0.992188	0.867188	0.929688	0.984375	0.742188	0.742188
CAN	34	0.945312	0.945312	0.882812	0.492188	0.242188	0.492188	0.242188	0.992188	0.945312	0.945312	0.492188	0.898438	0.492188	0.117188	0.898438	0.929688	0.742188	0.492188	0.492188	0.242188	0.0546875	0.960938	0.945312	0.929688	0.867188	0.492188	0.242188	0.0234375		0.96875	0.945312	0.914062	0.492188	0.570312	0.492188	0.179688	0.929688	0.9375	0.835938	0.679688	0.492188	0.242188	0.0390625
CAN	35	0.992188	0.742188	0.710938	0.898438	0.742188	0.492188	0.492188	0.992188	0.851562	0.695312	0.695312	0.804688	0.695312	0.460938	0.992188	0.992188	0.992188	0.992188	0.976562	0.492188	0.242188	0.992188	0.992188	0.945312	0.945312	0.773438	0.929688	0.976562		0.992188	0.796875	0.703125	0.796875	0.773438	0.59375	0.476562	0.992188	0.992188	0.96875	0.96875	0.875	0.710938	0.609375
CAN	36	0.757812	0.789062	0.320312	0.179688	0.492188	0.117188	0.0078125	0.960938	0.882812	0.804688	0.820312	0.492188	0.0546875	0.0859375	0.929688	0.898438	0.554688	0.898438	0.835938	0.757812	0.117188	0.992188	0.960938	0.960938	0.898438	0.945312	0.945312	0.742188		0.859375	0.835938	0.5625	0.5	0.492188	0.0859375	0.046875	0.960938	0.929688	0.757812	0.898438	0.890625	0.851562	0.429688
CAN	37	0.804688	0.820312	0.679688	0.492188	0.492188	0.210938	0.164062	0.992188	0.867188	0.867188	0.867188	0.601562	0.351562	0.242188	0.882812	0.992188	0.882812	0.992188	0.492188	0.476562	0.476562	0.960938	0.867188	0.867188	0.992188	0.929688	0.992188	0.992188		0.898438	0.84375	0.773438	0.679688	0.546875	0.28125	0.203125	0.921875	0.929688	0.875	0.992188	0.710938	0.734375	0.734375
CAN	38	0.945312	0.992188	0.492188	0.117188	0.492188	0.257812	0.117188	0.992188	0.992188	0.945312	0.945312	0.945312	0.242188	0.117188	0.992188	0.976562	0.554688	0.882812	0.492188	0.195312	0.101562	0.992188	0.945312	0.945312	0.742188	0.757812	0.492188	0.242188		0.96875	0.992188	0.71875	0.53125	0.71875	0.25	0.117188	0.992188	0.960938	0.75	0.8125	0.625	0.34375	0.171875
CAN	39	0.992188	0.992188	0.945312	0.820312	0.898438	0.398438	0.101562	0.992188	0.992188	0.960938	0.976562	0.882812	0.414062	0.0546875	0.992188	0.945312	0.976562	0.914062	0.945312	0.242188	0.0859375	0.992188	0.992188	0.492188	0.882812	0.992188	0.960938	0.242188		0.992188	0.992188	0.953125	0.898438	0.890625	0.40625	0.078125	0.992188	0.96875	0.734375	0.898438	0.96875	0.601562	0.164062
CAN	40	0.929688	0.695312	0.695312	0.679688	0.367188	0.492188	0.242188	0.960938	0.851562	0.804688	0.742188	0.695312	0.617188	0.242188	0.695312	0.695312	0.679688	0.585938	0.679688	0.585938	0.414062	0.867188	0.726562	0.726562	0.851562	0.710938	0.695312	0.492188		0.945312	0.773438	0.75	0.710938	0.53125	0.554688	0.242188	0.78125	0.710938	0.703125	0.71875	0.695312	0.640625	0.453125
CAN	41	0.992188	0.492188	0.242188	0.492188	0.242188	0.0546875	0.0546875	0.992188	0.492188	0.851562	0.507812	0.242188	0.492188	0.0390625	0.960938	0.726562	0.945312	0.789062	0.757812	0.117188	0.242188	0.945312	0.992188	0.773438	0.882812	0.554688	0.445312	0.117188		0.992188	0.492188	0.546875	0.5	0.242188	0.273438	0.046875	0.953125	0.859375	0.859375	0.835938	0.65625	0.28125	0.179688
AVERAGE CONTROLS		0.792915	0.64886	0.560445	0.452588	0.375613	0.296726	0.14543	0.824124	0.748666	0.706745	0.649581	0.608427	0.417492	0.196827	0.914253	0.862729	0.802515	0.758689	0.687881	0.533613	0.340854	0.95515	0.898386	0.865939	0.826269	0.815283	0.712674	0.532389		0.808519	0.698763	0.633595	0.551085	0.49202	0.357109	0.171128	0.934702	0.880557	0.834227	0.792479	0.751582	0.623143	0.436621
