# Supplementary material for: The role of ventromedial prefrontal cortex in reward valuation and future thinking during intertemporal choice
Source: eLife. 2021 Aug 3;10:e67387. doi: 10.7554/eLife.67387 (PMC8331177; doi:10.7554/eLife.67387)
Supplement: Figure 3—source data 1. [file elife-67387-fig3-data1.xlsx]

## Sheet: Sheet1
			STANDARD CONDITION							EFT CONDITION
			collapsing across REWARDs							collapsing across REWARDs
VMPFC patients			1 week	1 month	3 months	6 months	1 year	3 years	10 years	1 week	1 month	3 months	6 months	1 year	3 years	10 years
testing site			1	4	14	28	52	156	520	1	4	14	28	52	156	520
ITA	P1		0.984406	0.734406	0.679718	0.484406	0.179718	0.304718	0.0703433	0.715083	0.496333	0.332083	0.371333	0.246333	0.4915	0.01025
ITA	P2		0.820343	0.726595	0.476595	0.671905	0.484406	0.445345	0.195343	0.788333	0.850833	0.808833	0.757	0.7775	0.9025	0.93375
ITA	P3		0.812532	0.742218	0.52347	0.664092	0.492218	0.304718	0.226593	0.9025	0.94975	0.768333	0.689917	0.519333	0.371333	0.183667
ITA	P4		0.757844	0.406282	0.601592	0.367219	0.382845	0.21878	0.0390933	0.689917	0.5185	0.347833	0.348	0.316667	0.347833	0.280917
CAN	P5		0.367188	0.554688	0.242188	0.195312	0.140625	0.0546875	0.015625	0.625	0.625	0.460938	0.578125	0.429688	0.53125	0.226562
CAN	P6		0.992188	0.757812	0.3125	0.0859375	0.632812	0.179688	0.015625	0.96875	0.242188	0.242188	0.179688	0.367188	0.5	0.0625
CAN	P7		0.585938	0.289062	0.601562	0.3125	0.078125	0.0625	0.0078125	0.632812	0.335938	0.289062	0.601562	0.273438	0.875	0.0546875
CAN	P8		0.992188	0.773438	0.695312	0.90625	0.617188	0.179688	0.078125	0.695312	0.953125	0.898438	0.75	0.882812	0.648438	0.46875
CAN	P9		0.90625	0.625	0.5	0.71875	0.492188	0.304688	0.101562	0.914062	0.9375	0.9375	0.929688	0.6875	0.476562	0.375
CAN	P10		0.90625	0.742188	0.796875	0.835938	0.71875	0.429688	0.296875	0.96875	0.9375	0.6875	0.632812	0.367188	0.523438	0.335938
CAN	P11		0.96875	0.8125	0.617188	0.617188	0.601562	0.367188	0.21875	0.96875	0.875	0.71875	0.960938	0.078125	0.0546875	0.0078125
CAN	P12		0.9375	0.90625	0.867188	0.78125	0.6875	0.367188	0.492188	0.796875	0.773438	0.765625	0.71875	0.679688	0.515625	0.726562
*in red vmPFC, extending into LPFC
AVERAGE VMPFC			0.835948	0.672537	0.576182	0.553396	0.458995	0.26824	0.146495	0.805512	0.707925	0.604757	0.626484	0.468788	0.519847	0.305533
HEALTHY CONTROLS
ITA	1		0.726595	0.335968	0.867217	0.585968	0.492218	0.367218	0.0469075	0.996333	0.940083	0.871333	0.877583	0.85425	0.439917	0.0665
ITA	2		0.500032	0.43753	0.179718	0.117218	0.164095	0.109405	0.109407	0.777583	0.63725	0.6605	0.481	0.363333	0.738333	0.61675
ITA	3		0.890655	0.617218	0.625032	0.531282	0.492318	0.539095	0.0547183	0.956	0.815083	0.621333	0.689917	0.76825	0.496333	0.308667
ITA	4		0.929717	0.554718	0.640655	0.500032	0.445342	0.226593	0.0390942	0.996333	0.965	0.84	0.839833	0.613333	0.558667	0.456833
ITA	5		0.609406	0.796905	0.710969	0.554718	0.55472	0.875032	0.164093	0.92475	0.92125	0.93375	0.86675	0.90875	0.808833	0.89
ITA	6		0.992218	0.984406	0.679718	0.500032	0.55472	0.171906	0.00764417	0.996333	0.996333	0.996333	0.933833	0.887167	0.4165	0.01025
ITA	7		0.453155	0.96878	0.953157	0.914093	0.914093	0.523468	0.492219	0.975833	0.983833	0.983833	0.9605	0.957083	0.887167	0.752583
ITA	8		0.554718	0.226593	0.226593	0.0859683	0.070345	0.0156567	0.00784417	0.8245	0.621333	0.481	0.465	0.348	0.348	0.1605
ITA	9		0.312531	0.34378	0.242218	0.164095	0.05472	0.0312817	0.02347	0.933833	0.816667	0.84	0.488333	0.356	0.324667	0.452417
ITA	10		0.429718	0.234406	0.867218	0.789095	0.55472	0.937532	0.00784417	0.94975	0.9525	0.94	0.871083	0.839833	0.777333	0.408583
ITA	11		0.742218	0.65628	0.898467	0.437531	0.906281	0.429718	0.695343	0.996333	0.971333	0.988333	0.940083	0.92475	0.92475	0.815083
ITA	12		0.914095	0.828156	0.84378	0.773468	0.804717	0.523467	0.289093	0.996333	0.971333	0.925833	0.92475	0.92475	0.846167	0.63525
ITA	13		0.804718	0.664093	0.835968	0.773468	0.898468	0.757842	0.406282	0.983833	0.93725	0.848	0.863167	0.93725	0.808667	0.78375
ITA	14		0.671908	0.375032	0.265656	0.546907	0.507844	0.320345	0.109406	0.554167	0.554167	0.772917	0.554167	0.566667	0.554167	0.541667
ITA	15		0.750033	0.460968	0.476594	0.35928	0.265655	0.234406	0.00784417	0.988333	0.691667	0.996333	0.822917	0.996333	0.47925	0.0898333
ITA	16		0.859407	0.554718	0.507843	0.742218	0.15628	0.742218	0.750031	0.996333	0.996333	0.838333	0.9525	0.957083	0.800833	0.808667
ITA	17		0.687532	0.398468	0.507842	0.585967	0.34378	0.265655	0.0547183	0.89	0.858667	0.671167	0.613333	0.687167	0.558667	0.582083
ITA	18		0.750032	0.507844	0.414093	0.375032	0.398468	0.0781567	0.0390933	0.783583	0.666583	0.566667	0.629167	0.6665	0.402333	0.254
ITA	19		0.617218	0.851594	0.171906	0.531282	0.367218	0.203157	0.00784417	0.996333	0.933833	0.9025	0.84	0.675667	0.496333	0.121167
ITA	20		0.867218	0.890655	0.62503	0.648468	0.632842	0.242218	0.0390925	0.996333	0.933833	0.94	0.8775	0.822917	0.871167	0.4415
ITA	21		0.429718	0.531282	0.531281	0.796906	0.257844	0.789093	0.632842	0.965	0.996333	0.981	0.981	0.965	0.93375	0.8355
ITA	22		0.968782	0.835968	0.437532	0.179719	0.0859683	0.0156567	0.00784417	0.621083	0.465	0.47125	0.4525	0.44	0.44	0.605833
ITA	23		0.843781	0.882843	0.80472	0.585968	0.539093	0.289095	0.132843	0.996333	0.9025	0.715	0.816667	0.715	0.558667	0.308833
ITA	24		0.789095	0.640657	0.453157	0.195343	0.0703442	0.179719	0.00784417	0.933833	0.7185	0.996333	0.832	0.47125	0.457	0.502583
ITA	25		0.992218	0.86722	0.546906	0.304718	0.515656	0.382845	0.03128	0.996333	0.965083	0.9525	0.925833	0.754167	0.84	0.366667
ITA	26		0.976595	0.703156	0.515658	0.609407	0.828156	0.390657	0.109405	0.996333	0.996333	0.7775	0.6445	0.808833	0.582	0.144333
ITA	27		0.742218	0.648467	0.750031	0.515655	0.484405	0.250032	0.0859683	0.996333	0.996333	0.9025	0.933667	0.957083	0.715	0.621333
CAN	28		0.875	0.546875	0.734375	0.6875	0.21875	0.0078125	0.0078125	0.953125	0.851562	0.953125	0.945312	0.945312	0.695312	0.601562
CAN	29		0.945312	0.921875	0.96875	0.84375	0.84375	0.304688	0.617188	0.953125	0.9375	0.9375	0.914062	0.851562	0.992188	0.453125
CAN	30		0.929688	0.984375	0.523438	0.179688	0.164062	0.03125	0.0078125	0.914062	0.929688	0.90625	0.242188	0.492188	0.492188	0.132812
CAN	31		0.992188	0.742188	0.546875	0.742188	0.5625	0.492188	0.0546875	0.976562	0.90625	0.648438	0.585938	0.46875	0.320312	0.0546875
CAN	32		0.992188	0.992188	0.71875	0.367188	0.367188	0.179688	0.148438	0.992188	0.992188	0.992188	0.992188	0.992188	0.835938	0.554688
CAN	33		0.992188	0.992188	0.984375	0.960938	0.890625	0.796875	0.429688	0.992188	0.992188	0.867188	0.929688	0.984375	0.742188	0.742188
CAN	34		0.96875	0.945312	0.914062	0.492188	0.570312	0.492188	0.179688	0.929688	0.9375	0.835938	0.679688	0.492188	0.242188	0.0390625
CAN	35		0.992188	0.796875	0.703125	0.796875	0.773438	0.59375	0.476562	0.992188	0.992188	0.96875	0.96875	0.875	0.710938	0.609375
CAN	36		0.859375	0.835938	0.5625	0.5	0.492188	0.0859375	0.046875	0.960938	0.929688	0.757812	0.898438	0.890625	0.851562	0.429688
CAN	37		0.898438	0.84375	0.773438	0.679688	0.546875	0.28125	0.203125	0.921875	0.929688	0.875	0.992188	0.710938	0.734375	0.734375
CAN	38		0.96875	0.992188	0.71875	0.53125	0.71875	0.25	0.117188	0.992188	0.960938	0.75	0.8125	0.625	0.34375	0.171875
CAN	39		0.992188	0.992188	0.953125	0.898438	0.890625	0.40625	0.078125	0.992188	0.96875	0.734375	0.898438	0.96875	0.601562	0.164062
CAN	40		0.945312	0.773438	0.75	0.710938	0.53125	0.554688	0.242188	0.78125	0.710938	0.703125	0.71875	0.695312	0.640625	0.453125
CAN	41		0.992188	0.492188	0.546875	0.5	0.242188	0.273438	0.046875	0.953125	0.859375	0.859375	0.835938	0.65625	0.28125	0.179688
AVERAGE CONTROLS			0.808519	0.698763	0.633595	0.551085	0.49202	0.357109	0.171128	0.934702	0.880557	0.834227	0.792479	0.751582	0.623143	0.436621
