# Supplementary material for: The role of ventromedial prefrontal cortex in reward valuation and future thinking during intertemporal choice
Source: eLife. 2021 Aug 3;10:e67387. doi: 10.7554/eLife.67387 (PMC8331177; doi:10.7554/eLife.67387)
Supplement: Figure 4—source data 1. [file elife-67387-fig4-data1.xlsx]

## Sheet: Sheet1
VMPFC patients		STANDARD CONDITION		EFT CONDITION			STANDARD CONDITION	EFT CONDITION															LARGE REWARD
site		SMALL REWARD	LARGE REWARD	SMALL REWARD	LARGE REWARD		collapsed REWARDs
ITA	P1	0.288963	0.16736	0.275035	0.293795		0.228162	0.284415
ITA	P2	0.342534	0.408392	0.895327	0.880085		0.375463	0.887706
ITA	P3	0.221676	0.428193	0.288047	0.41601		0.324934	0.352028
ITA	P4	0.137136	0.249682	0.380015	0.265822		0.193409	0.322918
CAN	P5	0.0831572	0.0520473	0.442236	0.382897		0.0676023	0.412566
CAN	P6	0.183637	0.190533	0.0566244	0.564287		0.187085	0.310456
CAN	P7	0.087409	0.0527686	0.465895	0.497214		0.0700888	0.481555
CAN	P8	0.255773	0.236076	0.620882	0.631674		0.245924	0.626278
CAN	P9	0.277508	0.285821	0.56666	0.432901		0.281664	0.49978
CAN	P10	0.511983	0.381068	0.44497	0.457024		0.446525	0.450997
CAN	P11	0.308286	0.42266	0.102082	0.100554		0.365473	0.101318
CAN	P12	0.570506	0.398015	0.682165	0.569174		0.484261	0.62567
*in red vmPFC, extending into LPFC
AVERAGE VMPFC		0.272381	0.272718	0.434995	0.45762		0.272549	0.446307
HEALTHY CONTROLS
ITA	1	0.191708	0.387169	0.53985	0.246389		0.289438	0.39312
ITA	2	0.11454	0.131113	0.837082	0.43326		0.122826	0.635171
ITA	3	0.353762	0.378645	0.460106	0.49729		0.366203	0.478698
ITA	4	0.111334	0.314255	0.481929	0.620627		0.212795	0.551278
ITA	5	0.481432	0.653165	0.864622	0.844612		0.567298	0.854617
ITA	6	0.157608	0.236036	0.215887	0.528856		0.196822	0.372372
ITA	7	0.36804	0.809689	0.849061	0.857455		0.588864	0.853258
ITA	8	0.0326588	0.0291818	0.228123	0.358964		0.0309203	0.293544
ITA	9	0.0451792	0.0454184	0.19854	0.595805		0.0452988	0.397173
ITA	10	0.524957	0.566472	0.520451	0.807679		0.545714	0.664065
ITA	11	0.524094	0.666114	0.889217	0.885289		0.595104	0.887253
ITA	12	0.237656	0.755145	0.727238	0.846906		0.4964	0.787072
ITA	13	0.659131	0.645265	0.736777	0.901963		0.652198	0.81937
ITA	14	0.159958	0.396945	0.228056	0.881633		0.278451	0.554845
ITA	15	0.137402	0.207715	0.457775	0.411043		0.172559	0.434409
ITA	16	0.643446	0.683776	0.726825	0.935006		0.663611	0.830915
ITA	17	0.220149	0.221897	0.366176	0.815356		0.221023	0.590766
ITA	18	0.0950181	0.164212	0.434678	0.363048		0.129615	0.398863
ITA	19	0.0635926	0.287159	0.390904	0.438067		0.175376	0.414485
ITA	20	0.222952	0.281407	0.596841	0.8349		0.25218	0.715871
ITA	21	0.680114	0.634438	0.9612	0.848899		0.657276	0.90505
ITA	22	0.0468454	0.0514363	0.60066	0.397706		0.0491408	0.499183
ITA	23	0.125036	0.46617	0.270591	0.745394		0.295603	0.507993
ITA	24	0.0994452	0.138751	0.185055	0.822344		0.119098	0.503699
ITA	25	0.20573	0.361652	0.605271	0.733717		0.283691	0.669494
ITA	26	0.167629	0.55726	0.441825	0.495325		0.362444	0.468575
ITA	27	0.191367	0.304585	0.587658	0.86705		0.247976	0.727354
CAN	28	0.0994281	0.0681473	0.461191	0.958382		0.0837877	0.709786
CAN	29	0.308427	0.739737	0.774377	0.784028		0.524082	0.779202
CAN	30	0.0579859	0.0805822	0.4075	0.334719		0.069284	0.37111
CAN	31	0.334509	0.389301	0.202172	0.339712		0.361905	0.270942
CAN	32	0.276801	0.167361	0.615278	0.918403		0.222081	0.76684
CAN	33	0.650304	0.73266	0.580382	0.988324		0.691482	0.784353
CAN	34	0.387308	0.427041	0.237173	0.244585		0.407175	0.240879
CAN	35	0.546768	0.628369	0.500824	0.926606		0.587568	0.713715
CAN	36	0.141936	0.177001	0.545115	0.871297		0.159469	0.708206
CAN	37	0.258527	0.381934	0.512648	0.978319		0.320231	0.745483
CAN	38	0.247679	0.337934	0.244069	0.462588		0.292807	0.353328
CAN	39	0.392231	0.387087	0.325935	0.699197		0.389659	0.512566
CAN	40	0.403123	0.506914	0.539938	0.632255		0.455019	0.586096
CAN	41	0.106384	0.311071	0.292972	0.374437		0.208728	0.333705
AVERAGE CONTROLS		0.270053	0.383176	0.503463	0.671401		0.326615	0.587432
